# Supplementary material for: Unusual defect properties of the one-dimensional photovoltaic semiconductor selenium
Source: Royal Society of Chemistry journal article supplement (doi:10.1039/d4cc03174a), 2024-01-01
Supplement: d4cc03174a1.pdf [file d4cc03174a1.pdf]

## Electronic Supplementary Information (ESI)

### Unusual defect properties of the one-dimensional photovoltaic semiconductor selenium

Zongbao Li,<sup>a,b†</sup> Xiaoyan An,<sup>c,d†</sup> Xia Wang,<sup>e</sup> Wenbo Lu,<sup>c,d</sup> Xin Wen,<sup>c,d</sup> Xing Zhang<sup>c,d</sup>  
and Ding-Jiang Xue\*<sup>c,d</sup>

<sup>a</sup> Ministry of Education Key Laboratory of Textile Fiber Products, School of Materials Science and Engineering, Wuhan Textile University, Wuhan 430220, China

<sup>b</sup> School of Material and Chemical Engineering, Tongren University, Tongren 554300, China

<sup>c</sup> Beijing National Laboratory for Molecular Sciences (BNLMS), CAS key Laboratory of Molecular Nanostructure and Nanotechnology, Institute of Chemistry, Chinese Academy of Sciences, Beijing 100190, China

<sup>d</sup> University of Chinese Academy of Sciences, Beijing 100149, China

<sup>e</sup> Hubei Collaborative Innovation Center for Advanced Organic Chemical Materials, Ministry of Education Key Laboratory for the Green Preparation and Application of Functional Materials, School of Materials Science and Engineering, Hubei University, Wuhan 430062, China

† Z. Li and X. An contributed equally

\* Corresponding author: [djxue@iccas.ac.cn](mailto:djxue@iccas.ac.cn)

This file contains Calculation Methods, Fig. S1-S5, and Table S1.

## Calculation Methods

All the crystal structures, formation energies, and electronic structures were calculated using the density functional theory with the projector augmented plane-wave method, as implemented in the Vienna Ab initio Simulation Package (VASP).<sup>1,2</sup> The crystal structures and formation energies were calculated using the Perdew-Burke-Ernzerhof (PBE) generalized gradient approximation (GGA).<sup>3</sup> The cutoff energy for the plane wave is set to 450 eV. The hybrid functional in the Heyd-Scuseria-Ernzerhof (HSE) form with a fraction  $\alpha = 25\%$  of Hartree-Fock exchange was used for calculation of the electronic structure.<sup>4,5</sup> The energy criterion is set to  $10^{-5}$  eV in iterative solution of the Kohn-Sham equation. All the structures are relaxed until the residual forces on the atoms are less than 0.02 eV/Å.

Several supercells containing different numbers of Se atoms were built, and the corresponding formation energies of two intrinsic point defects were calculated, as shown in Table S1. Although the differences in the formation energies and the transition energy levels of the two defects between the different supercells are negligible, we use a  $3 \times 4 \times 4$  supercell (144 atoms) here to achieve more accurate results, considering the high computational cost of HSE06. For the electronic structure calculations of intrinsic point defects, the first Brillouin zone was sampled using a Monkhorst Pack scheme on a  $3 \times 3 \times 3$  mesh.

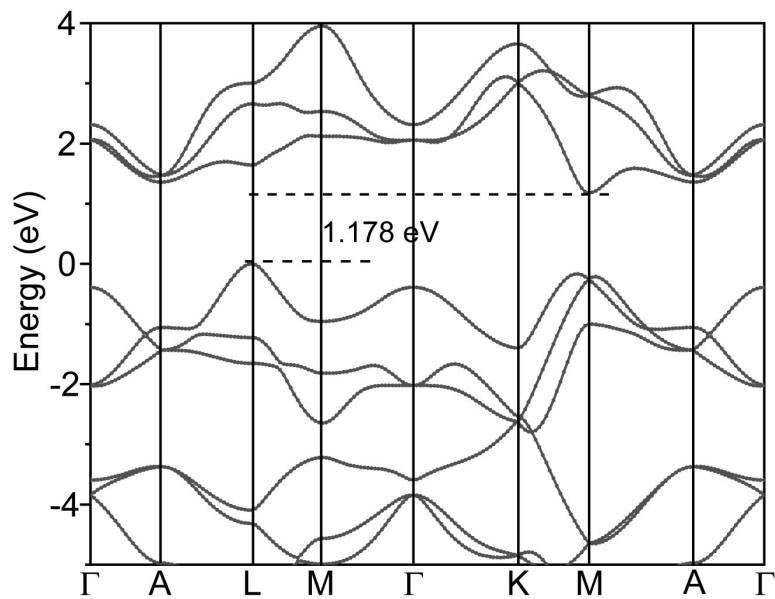

**Fig. S1** Band structure of t-Se calculated using the PBE level.

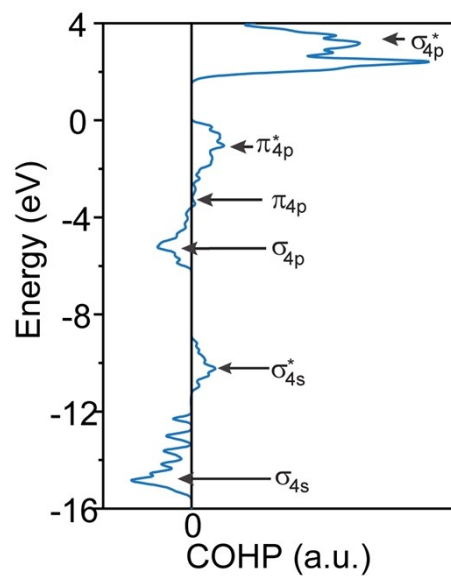

**Fig. S2** Calculated COHP of t-Se.

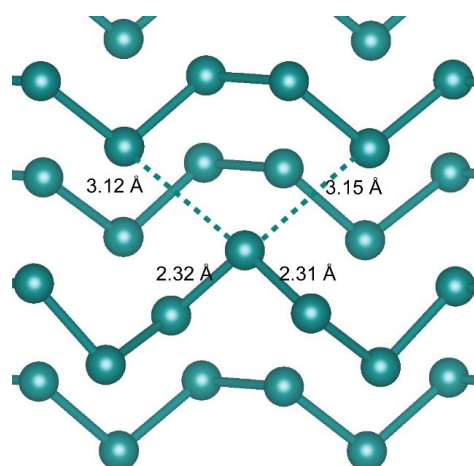

**Fig. S3** The crystal structure of optimized  $\text{Se}_i$ .

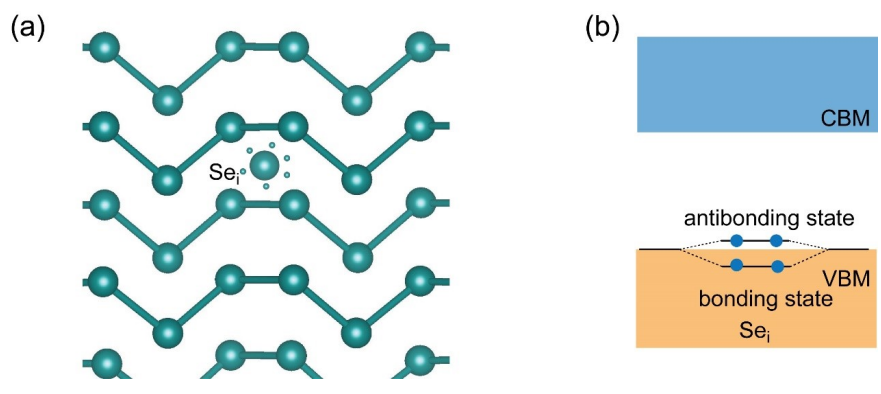

**Fig. S4** Schematic diagram of (a) Se<sub>i</sub> and (b) its defect level.

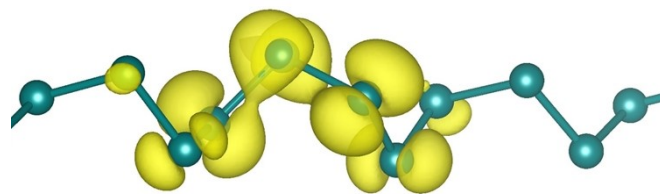

**Fig. S5** Contour plot of the norm-squared wave function of the defect state of  $\text{Se}_i$ .

**Table S1** Formation energies and transition energy levels of two defects in different supercells.

| Supercell | Number of atoms | Formation energy (eV) |                 | Transition energy levels of two defects above VBM (eV) |                 |
|-----------|-----------------|-----------------------|-----------------|--------------------------------------------------------|-----------------|
|           |                 | V <sub>Se</sub>       | Se <sub>i</sub> | V <sub>Se</sub>                                        | Se <sub>i</sub> |
| 3 × 3 × 3 | 81              | 1.42                  | 1.68            | 0.18                                                   | 0.20            |
| 3 × 3 × 4 | 108             | 1.42                  | 1.67            | 0.18                                                   | 0.21            |
| 3 × 4 × 4 | 144             | 1.41                  | 1.67            | 0.19                                                   | 0.21            |



## References

- [1] G. Kresse, J. Hafner, *Phys. Rev. B*, 1993, **47**, 558-561.
- [2] G. Kresse, J. Hafner. *Phys, Rev. B*, 1994, **49**, 14251-14269.
- [3] J.P. Perdew, K. Burke, M. Ernzerhof. *Phys. Rev. Lett.*, 1996, **77**, 3865-3868.
- [4] J. Heyd, J. E. Peralta, G. E. Scuseria, R. L. Martin, *J. Chem. Phys.*, 2005, **123**, 174101.
- [5] J. Heyd, G. E. Scuseria, M. Ernzerhof, *J. Chem. Phys.*, 2003, **118**, 8207–8215.
